# Supplementary material for: Pharmacokinetic Analysis of the Bioavailability of AQUATURM®, a Water-Soluble Curcumin Formulation in Comparison to a Conventional Curcumin Tablet, in Human Subjects
Source: Preprints.org preprint supplement (doi:10.20944/preprints202409.1977.v1), 2024-09-25
Supplement: Supplementary file 1 [file supplementary]

Supplementary Figure 1

| 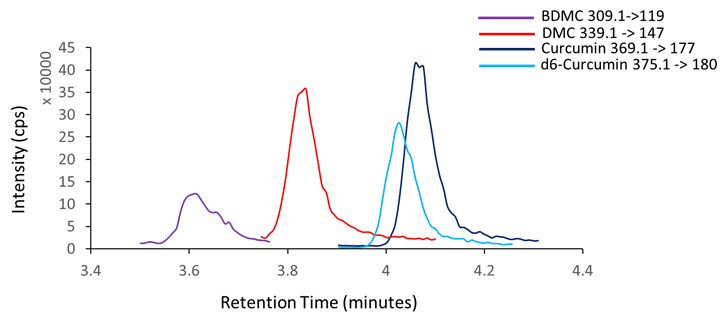 |
| --- |

Chromatogram showing the retention times of the 3 curcuminoids plus deuterated curcumin
